# Supplementary material
Source: publisher figshare collection journal article supplement (https://springernature.figshare.com/ndownloader/files/13075625)
Supplement: Supplementary file 1 [file 13075625]

**Table S1** Matching diagnostic codes between the *KCD-7* and *ICD-10* classification

| KCD-7 | ICD-10 |
| --- | --- |
| D86 Sarcoidosis | D86 Sarcoidosis |
| D86.0 Sarcoidosis of lung | D86.0 Sarcoidosis of lung |
| D86.1 Sarcoidosis of lymph nodes | D86.1 Sarcoidosis of lymph nodes |
| D86.2 Sarcoidosis of lung with sarcoidosis of lymph nodes | D86.2 Sarcoidosis of lung with sarcoidosis of lymph nodes |
| D86.3 Sarcoidosis of skin | D86.3 Sarcoidosis of skin |
| D86.8 Sarcoidosis of other sites | D86.8 Sarcoidosis of other sites |
|  | D86.81 Sarcoid meningitis |
|  | D86.82 Multiple cranial nerve palsies in sarcoidosis |
|  | D86.83 Sarcoid iridocyclitis |
|  | D86.84 Sarcoid pyelonephritis |
|  | D86.85 Sarcoid myocarditis |
|  | D86.86 Sarcoid arthropathy |
|  | D86.87 Sarcoid myositis |
|  | D86.89 Sarcoidosis of other sites |
| D86.9 Sarcoidosis, unspecific | D86.9 Sarcoidosis, unspecific |
| E10-E14 Diabetes mellitus | E10-E14 Diabetes mellitus |
| E78 Disorders of lipoprotein metabolism and other lipidaemias | E78 Disorders of lipoprotein metabolism and other lipidaemias |
| G51.0 Bell’s palsy | G51.0 Bell palsy |
| G53.2 Multiple cranial nerve palsies in sarcoidosis | G53.2 Multiple cranial nerve palsies in sarcoidosis |
| H20.0 Acute and subacute iridocyclitis | H20.0 Acute and subacute iridocyclitis |
| H22.0 Acute and subacute iridocyclitis in infectious and parasitic diseases classified elsewhere iridocyclitis | H22.0 Acute and subacute iridocyclitis in infectious and parasitic diseases classified elsewhere iridocyclitis |
| I10-I15 Hypertensive diseases | I10-I15 Hypertensive diseases |
| I47 Paroxysmal tachycardia | I47 Paroxysmal tachycardia |
| I48 Atrial fibrillation and flutter | I48 Atrial fibrillation and flutter |
| I49 Other cardiac arrhythmias | I49 Other cardiac arrhythmias |
| I50 Hear failure | I50 Hear failure |
| I88 Nonspecific lymphadenitis | I88 Nonspecific lymphadenitis |
| I89 Other noninfective disorders of lymphatic vessels and lymph nodes | I89 Other noninfective disorders of lymphatic vessels and lymph nodes |
| J84 Other interstitial pulmonary diseases | J84 Other interstitial pulmonary diseases |
| L52 Erythema nodosum | L52 Erythema nodosum |
| M63.3 Myositis in sarcoidosis | M63.3 Myositis in sarcoidosis |
| N17-N19 Renal failure | N17-N19 Renal failure |

*KCD-7*, *Korean Classification of Disease, 7th revision*; *ICD-10*, *International Classification of Disease, 10th revision*.

**Table S2.** Number of patients with sarcoidosis and prevalence rate (per 105 population) of sarcoidosis in Korea from 2007–2016

| Age group | Total | | | | Female | | | | Male | | | | Female-to-male ratio |
| --- | --- | --- | --- | --- | --- | --- | --- | --- | --- | --- | --- | --- | --- |
| N | Total Population | P | 95% CI | N | Total Population | P | 95% CI | N | Total Population | P | 95% CI |
| 0–19 years | 17 | 10,167,571 | 0.17 | 0.10-0.27 | 9 | 4,903,314 | 0.18 | 0.08-0.35 | 8 | 5,264,257 | 0.15 | 0.07-0.30 | 1.21 |
| 20–29 years | 152 | 6,695,952 | 2.27 | 1.92-2.66 | 38 | 3,169,220 | 1.20 | 0.85-1.65 | 114 | 3,526,732 | 3.23 | 2.67-3.88 | 0.37 |
| 30–39 years | 724 | 7,538,707 | 9.60 | 8.92-10.33 | 220 | 3,688,221 | 5.96 | 5.20-6.81 | 504 | 3,850,486 | 13.09 | 11.97-14.28 | 0.46 |
| 40–49 years | 984 | 8,716,227 | 11.29 | 10.59-12.02 | 554 | 4,297,638 | 12.89 | 11.84-14.01 | 430 | 4,418,589 | 9.73 | 8.83-10.70 | 1.32 |
| 50–59 years | 1,338 | 8,247,924 | 16.22 | 15.36-17.12 | 1,006 | 4,092,335 | 24.58 | 23.09-26.15 | 332 | 4,155,589 | 7.99 | 7.15-8.90 | 3.08 |
| 60–69 years | 962 | 5,151,264 | 18.68 | 17.51-19.89 | 691 | 2,648,485 | 26.09 | 24.18-20.08 | 271 | 2,502,779 | 10.83 | 9.58-12.20 | 2.41 |
| 70–79 years | 491 | 3,173,638 | 15.47 | 14.13-16.90 | 325 | 1,804,079 | 18.01 | 16.11-10.59 | 166 | 1,369,560 | 12.12 | 10.35-14.11 | 1.49 |
| ≥ 80 years | 123 | 1,421,690 | 8.65 | 7.19-10.32 | 84 | 981,867 | 8.56 | 6.82-10.59 | 39 | 439,823 | 8.87 | 6.31-12.12 | 0.96 |
| Total | 4,791 | 51,112,972 | 9.37 | 9.11-9.64 | 2,927 | 25,585,157 | 11.44 | 11.03-11.89 | 1,864 | 25,527,815 | 7.30 | 6.97-7.64 | 1.57 |

N, number of sarcoidosis. P, prevalence. CI, confidence interval.

**Table S3.** Number of patients with sarcoidosis and incidence rate (per 105 population at risk) of sarcoidosis in Korea from 2009–2015

| Age group | Total | | | | Female | | | | Male | | | | Female-to-male ratio |
| --- | --- | --- | --- | --- | --- | --- | --- | --- | --- | --- | --- | --- | --- |
| N | Population  at risk* | I | 95% CI | N | Population  at risk* | I | 95% CI | N | Population  at risk* | I | 95% CI |
| 0–19 years | 18 | 78,248,109 | 0.02 | 0.01–0.04 | 7 | 37,402,475 | 0.02 | 0.01–0.04 | 11 | 40,845,634 | 0.03 | 0.01-0.05 | 0.69 |
| 20–29 years | 235 | 47,256,633 | 0.50 | 0.44–0.57 | 62 | 22,622,442 | 0.27 | 0.21–0.35 | 173 | 24,634,191 | 0.70 | 0.60–0.82 | 0.39 |
| 30–39 years | 600 | 56,645,328 | 1.06 | 0.98–1.15 | 239 | 27,767,028 | 0.86 | 0.76–0.98 | 361 | 28,878,300 | 1.25 | 1.12–1.39 | 0.69 |
| 40–49 years | 658 | 61,185,356 | 1.08 | 0.99–1.16 | 438 | 30,068,409 | 1.46 | 1.32–1.60 | 220 | 31,116,947 | 0.71 | 0.62–0.81 | 2.06 |
| 50–59 years | 840 | 51,695,143 | 1.62 | 1.52–1.74 | 643 | 25,760,337 | 2.50 | 2.31–2.70 | 197 | 25,934,806 | 0.76 | 0.66–0.87 | 3.29 |
| 60–69 years | 457 | 30,162,447 | 1.52 | 1.38–1.66 | 309 | 15,680,785 | 1.97 | 1.76–2.20 | 148 | 14,481,663 | 1.02 | 0.86–1.20 | 1.93 |
| 70–79 years | 180 | 19,664,847 | 0.92 | 0.79–1.06 | 119 | 11,494,307 | 1.04 | 0.86–1.24 | 61 | 8,170,541 | 0.75 | 0.57–0.96 | 1.39 |
| ≥ 80 years | 11 | 7,392,026 | 0.15 | 0.07–0.27 | 6 | 5,222,142 | 0.11 | 0.04–0.25 | 5 | 2,169,884 | 0.23 | 0.07–0.254 | 0.50 |
| Total | 2,999 | 352,249,887 | 0.85 | 0.82–0.88 | 1,823 | 176,017,924 | 1.04 | 0.99–1.08 | 1,176 | 176,231,964 | 0.67 | 0.63–0.71 | 1.55 |

N, number of sarcoidosis. I, incidence. CI, confidence interval.

* The population at risk was defined by removing prevalent sarcoidosis cases from the mid-year Korean population

**Table S4.** Accompanying diagnostic codes in incident sarcoidosis casesafter registration

|  | Total | Female | Male |
| --- | --- | --- | --- |
| Dyslipidemia (E78) | 1,780 (59.4) | 1,179 (64.7) | 601 (51.1) |
| Hypertension (I10-15) | 1,148 (38.3) | 736 (40.4) | 412 (35.0) |
| Diabetes mellitus (E10-14) | 990 (33.0) | 626 (34.3) | 364 (31.0) |
| Ischemic heart disease (I20-25) | 455 (15.2) | 281 (15.4) | 174 (14.8) |
| Arrhythmias (I47-49) | 276 (9.2) | 176 (9.7) | 100 (8.5) |
| Uveitis (H20.0, H22.0) | 247 (8.3) | 172 (9.4) | 75 (6.4) |
| Heart failure (I50) | 177 (5.9) | 107 (5.9) | 70 (6.0) |
| Interstitial pulmonary diseases (J84) | 173 (5.8) | 93 (5.1) | 80 (6.8) |
| Renal failure (N17-19) | 147 (4.9) | 76 (4.2) | 71 (6.0) |
| Bell’s palsy (G51.0) | 47 (1.6) | 34 (1.9) | 13 (1.1) |
| Erythema nodosum (L52) | 36 (1.2) | 29 (1.6) | 7 (0.6) |
| Multiple cranial nerve palsies in sarcoidosis (G53.2) | 10 (0.3) | 6 (0.3) | 4 (0.3) |
| Myositis in sarcoidosis (M63.3) | 6 (0.2) | 5 (0.3) | 1 (0.1) |

Data are presented as N (%), unless otherwise indicated.
